# Supplementary material for: Exploring the Biological Properties of Zn(II) Bisthiosemicarbazone Helicates
Source: MDPI journal article supplement (doi:10.3390/ijms24032246), 2023-01-23
Supplement: s1 [file s1]

## Supporting Information

1. Bisthiosemicarbazone ligands  $H_2L^{Me}$ ,  $H_2L^{Ph}$  and  $H_2L^{PhNO_2}$ 
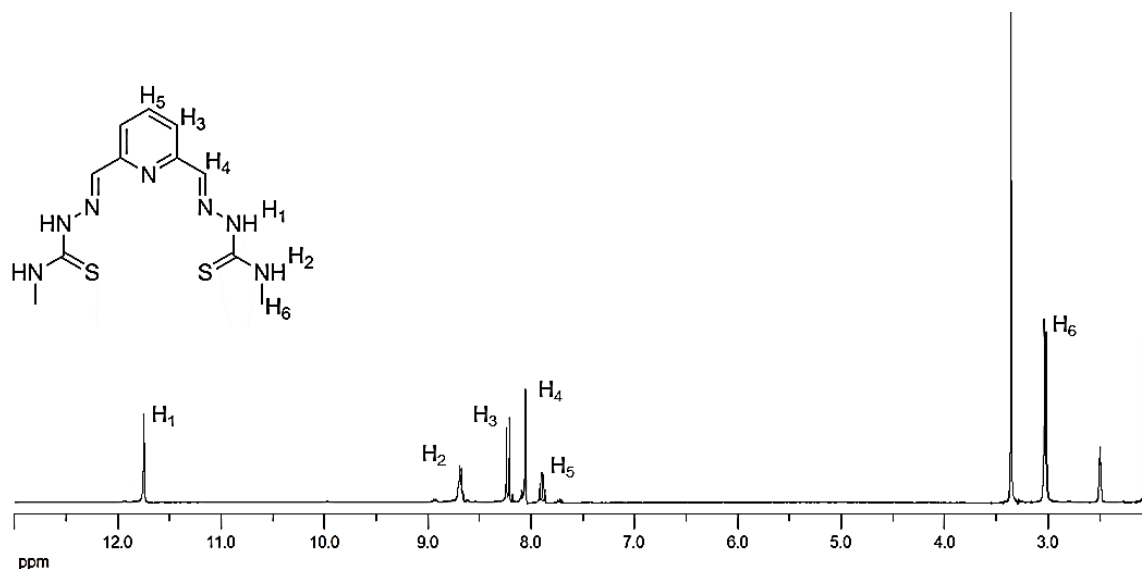

Figure S1.  $^1H$  NMR spectra of  $H_2L^{Me} \cdot 2H_2O$  (DMSO- $d_6$ , r.t.).  $^1H$  NMR [DMSO- $d_6$ ,  $\delta$  (m, nH, Hx, J)]: 11.76 (s, 2H, H<sub>1</sub>), 8.71 (ce, 2H, H<sub>2</sub>, J=4.4 Hz), 8.25 (d, 2H, H<sub>3</sub>, J=7.8 Hz), 8.06 (s, 2H, H<sub>4</sub>), 7.90 (t, 1H, H<sub>5</sub>, J=7.8 Hz), 3.04 (d, 6H, H<sub>6</sub>, J=4.1 Hz).

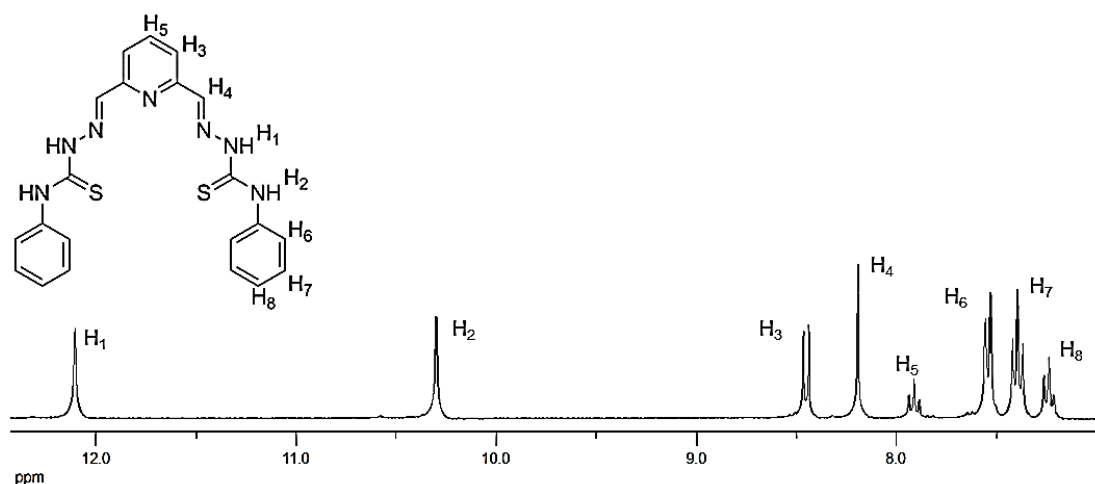

Figure S2.  $^1H$  NMR spectra of  $H_2L^{Ph} \cdot 2H_2O$  (DMSO- $d_6$ , r.t.).  $^1H$  NMR [DMSO- $d_6$ ,  $\delta$  (m, nH, Hx, J)]: 12.11 (s, 2H, H<sub>1</sub>), 10.30 (s, 2H, H<sub>2</sub>), 8.46 (d, 2H, H<sub>3</sub>, J=7.8 Hz), 8.19 (s, 2H, H<sub>4</sub>), 7.91 (t, 1H, H<sub>5</sub>, J=7.8 Hz), 7.56 (d, 4H, H<sub>6</sub>, J=7.6 Hz), 7.40 (ta, 4H, H<sub>7</sub>, J<sub>1</sub>=7.6 Hz, J<sub>2</sub>=8.0 Hz), 7.24 (t, 2H, H<sub>8</sub>, J<sub>1</sub>=7.4 Hz, J<sub>2</sub>=7.3 Hz).

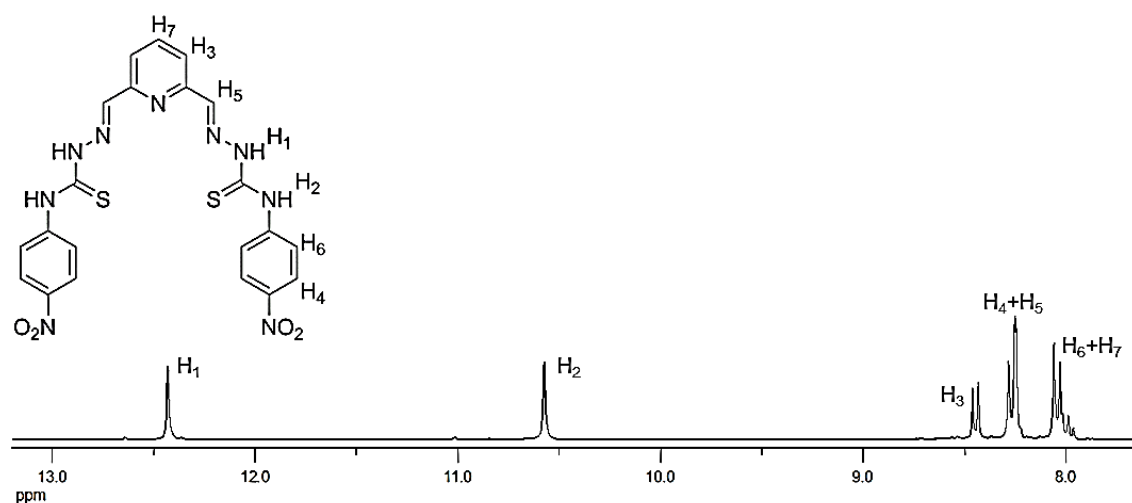

Figure S3.  $^1\text{H}$  NMR spectra of  $\text{H}_2\text{L}^{\text{PhNO}_2}$  ( $\text{DMSO-d}_6$ , r.t.).  $^1\text{H}$  NMR [ $\text{DMSO-d}_6$ ,  $\delta$  (m, nH, Hx, J)]: 12.43 (s, 2H, H<sub>1</sub>), 10.57 (s, 2H, H<sub>2</sub>), 8.46 (d, 2H, H<sub>3</sub>,  $J = 7.8$  Hz), 8.30–8.20 (m, 6H, H<sub>4</sub>+H<sub>5</sub>), 8.10–7.90 (m, 1H, H<sub>6</sub>+H<sub>7</sub>).

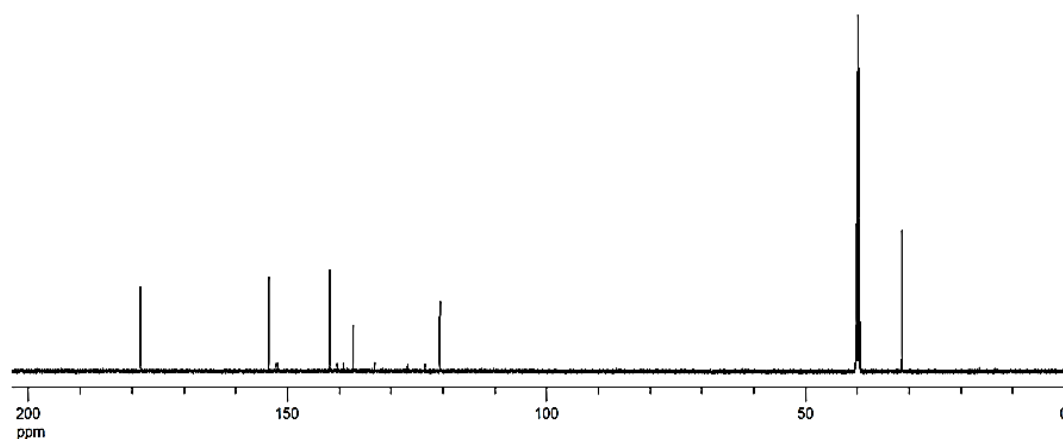

Figure S4.  $^{13}\text{C}$  NMR spectra of  $\text{H}_2\text{L}^{\text{Me}} \cdot 2\text{H}_2\text{O}$  ( $\text{DMSO-d}_6$ , r.t.).  $^{13}\text{C}$  NMR ( $\text{DMSO-d}_6$ , ppm): 178.3 (C=S), 153.3 (C=N), 141.3 (C<sub>ar</sub>), 137.5 (C<sub>ar</sub>), 120.6 (CH<sub>ar</sub>), 31.26 (CH<sub>3</sub>).

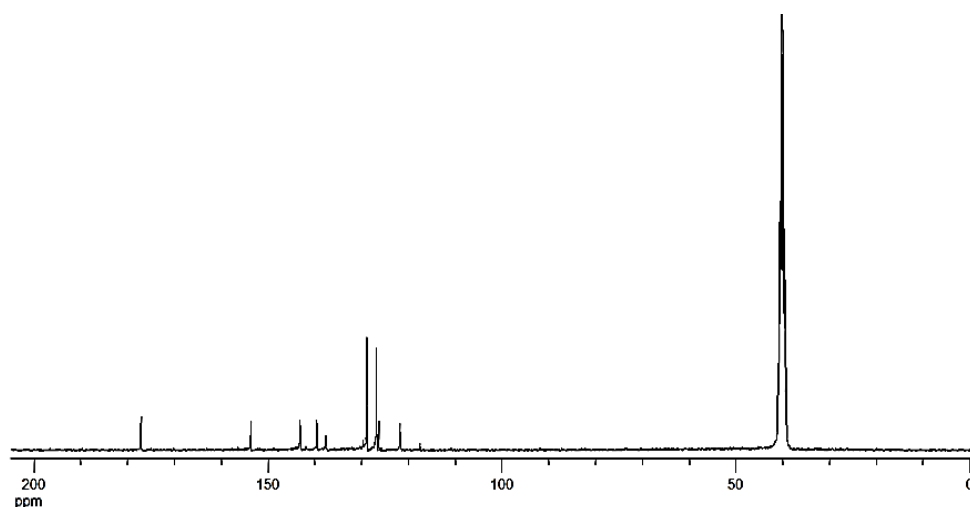

Figure S5.  $^{13}\text{C}$  NMR spectra of  $\text{H}_2\text{L}^{\text{Ph}} \cdot 2\text{H}_2\text{O}$  ( $\text{DMSO-d}_6$ , r.t.).  $^{13}\text{C}$  NMR ( $\text{DMSO-d}_6$ , ppm): 177.1 (C=S), 153.7 (C=N), 143.1 (C<sub>ar</sub>), 139.6 (C<sub>ar</sub>), 137.7 (CH<sub>ar</sub>), 128.8 (CH<sub>ar</sub>), 126.8 (CH<sub>ar</sub>), 126.3 (CH<sub>ar</sub>), 121.8 (CH<sub>ar</sub>).

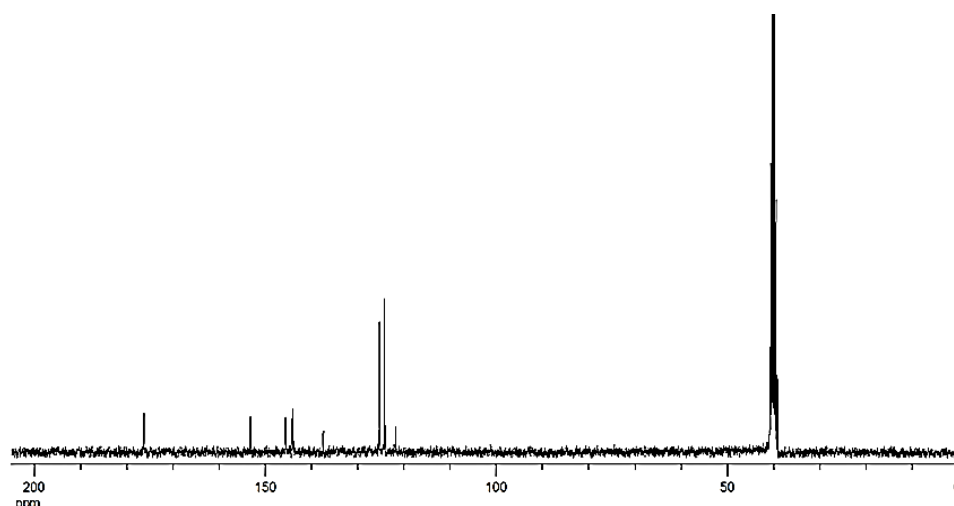

Figure S6.  $^{13}\text{C}$  NMR spectra of  $\text{H}_2\text{L}^{\text{PhNO}_2}$  ( $\text{DMSO-d}_6$ , r.t.).  $^{13}\text{C}$  NMR ( $\text{DMSO-d}_6$ , ppm): 176.4 (C=S), 153.3 (C=N), 145.7 ( $\text{C}_{\text{ar}}$ ), 144.2 ( $\text{C}_{\text{ar}}$ ), 144.0 ( $\text{C}_{\text{ar}}$ ), 137.5 ( $\text{CH}_{\text{ar}}$ ), 125.3 ( $\text{CH}_{\text{ar}}$ ), 124.2 ( $\text{CH}_{\text{ar}}$ ), 121.8 ( $\text{CH}_{\text{ar}}$ ).

## 2. Bisthiosemicarbazone derived zinc(II) dihelicates

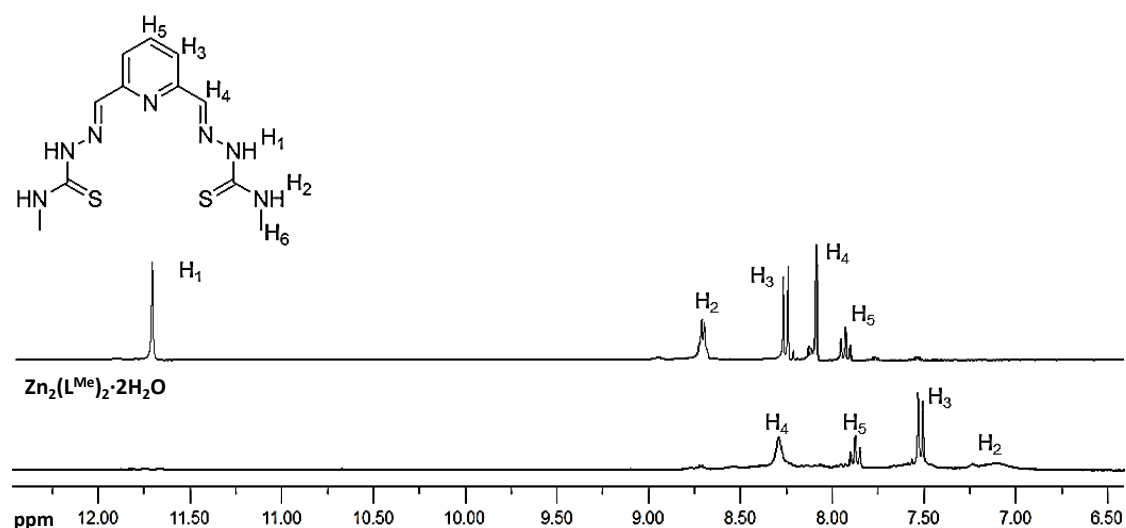

Figure S7.  $^1\text{H}$  NMR spectra of  $\text{Zn}_2(\text{L}^{\text{Me}})_2 \cdot 2\text{H}_2\text{O}$  ( $\text{DMSO-d}_6$ , r.t.).  $^1\text{H}$  NMR [ $\text{DMSO-d}_6$ ,  $\delta$  (m, nH, Hx, J)]: 8.26 (s, 2H,  $\text{H}_4$ ), 7.83 (t, 1H,  $\text{H}_5$ ,  $J = 7.7$  Hz), 7.48 (d, 2H,  $\text{H}_3$ ,  $J = 7.7$  Hz), 7.22 (sa, 1H,  $\text{H}_2$ ), 2.75 (d, 6H,  $\text{H}_6$ ,  $J = 4.2$  Hz).

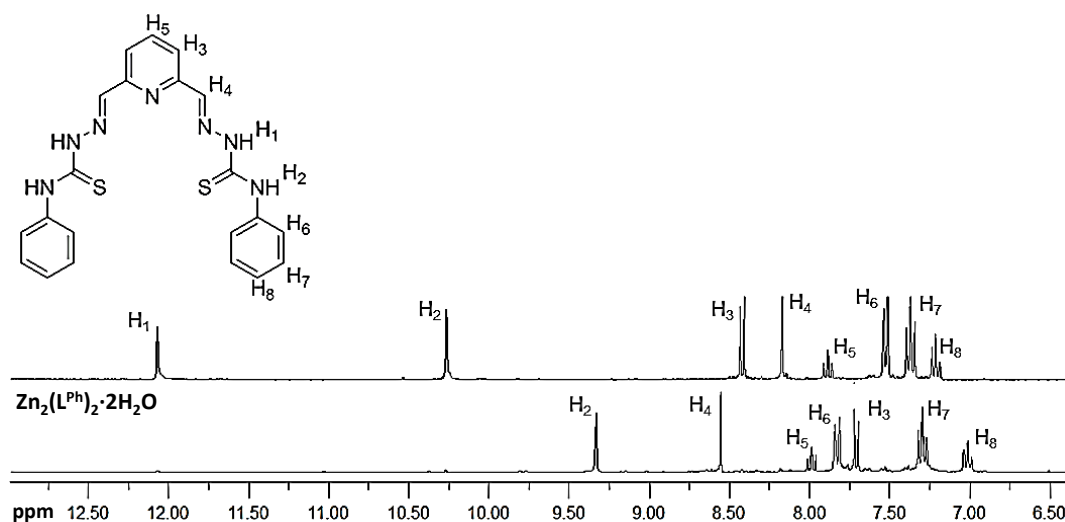

Figure S8.  $^1\text{H}$  NMR spectra of  $\text{Zn}_2(\text{L}^{\text{Ph}})_2 \cdot 2\text{H}_2\text{O}$  ( $\text{DMSO-d}_6$ , r.t.).  $^1\text{H}$  NMR [ $\text{DMSO-d}_6$ ,  $\delta$  (m, nH, Hx, J)]: 9.34 (s, 2H, H<sub>2</sub>), 8.56 (s, 2H, H<sub>4</sub>), 7.99 (d, 1H, H<sub>5</sub>, J = 7.8 Hz), 7.84 (d, 4H, H<sub>6</sub>, J = 7.8 Hz), 7.70 (d, 2H, H<sub>3</sub>, J = 7.8 Hz), 7.30 (ta, 4H, H<sub>7</sub>, J<sub>1</sub> = 7.8 Hz, J<sub>2</sub> = 8.0 Hz), 7.01 (ta, 2H, H<sub>8</sub>, J<sub>1</sub> = 7.4 Hz, J<sub>2</sub> = 6.9 Hz).

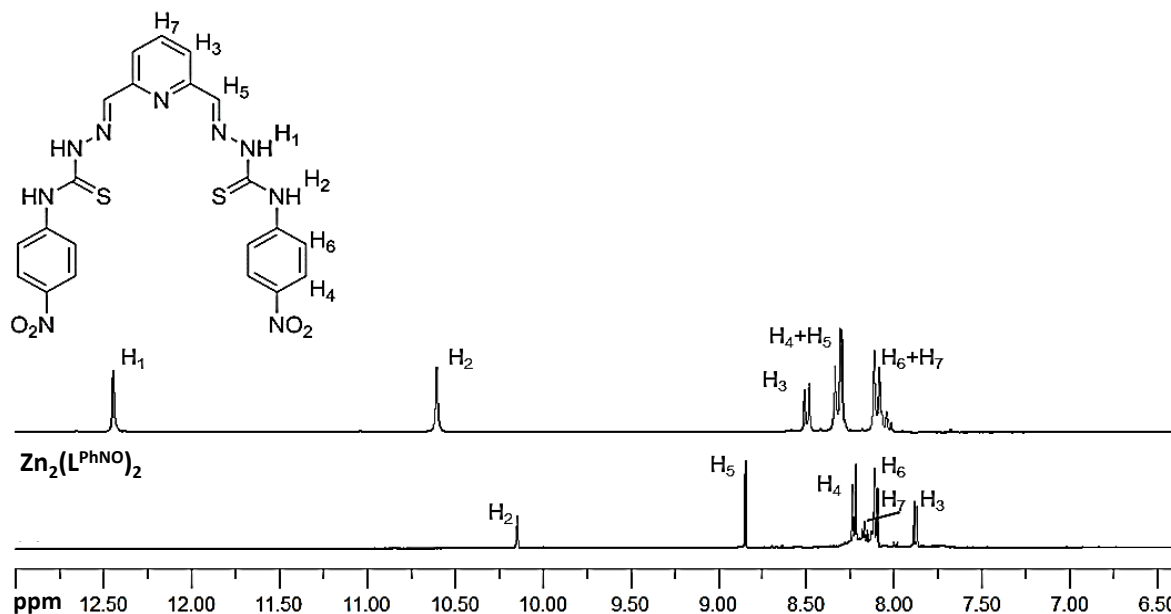

Figure S9.  $^1\text{H}$  NMR spectra of  $\text{Zn}_2(\text{L}^{\text{PhNO}_2})_2$  ( $\text{DMSO-d}_6$ , r.t.).  $^1\text{H}$  NMR [ $\text{DMSO-d}_6$ ,  $\delta$  (m, nH, Hx, J)]: 10.11 (s, 2H, H<sub>2</sub>), 8.80 (s, 2H, H<sub>5</sub>), 8.17 (d, 1H, H<sub>4</sub>, J = 7.7 Hz), 8.12 (t, 1H, H<sub>7</sub>, J = 7.7 Hz), 8.05 (d, 4H, H<sub>6</sub>, J = 9.3 Hz), 7.82 (d, 2H, H<sub>3</sub>, J = 7.7 Hz).

Table S1. Main crystallographic data for helicates  $[\text{Zn}_2(\text{L}^{\text{Me}})_2]\cdot 3\text{H}_2\text{O}$  **1\***,  $[\text{Zn}_2(\text{L}^{\text{Ph}})_2]\cdot 4\text{CH}_3\text{CN}$  **2\*** and  $[\text{Zn}_2(\text{L}^{\text{PhNO}_2})_2]$  **3\***.

|                                            | $[\text{Zn}_2(\text{L}^3\text{-Me})_2]\cdot 3\text{H}_2\text{O}$ | $[\text{Zn}_2(\text{L}^3\text{-Ph})_2]\cdot 4\text{CH}_3\text{CN}$ | $[\text{Zn}_2(\text{L}^3\text{-PhNO}_2)_2]$                              |
|--------------------------------------------|------------------------------------------------------------------|--------------------------------------------------------------------|--------------------------------------------------------------------------|
| <b>Molecular formula</b>                   | $\text{Zn}_2\text{C}_{22}\text{H}_{32}\text{N}_{14}\text{S}_4$   | $\text{Zn}_2\text{C}_{50}\text{H}_{46}\text{N}_{18}\text{S}_4$     | $\text{Zn}_2\text{C}_{42}\text{H}_{30}\text{N}_{18}\text{O}_8\text{S}_4$ |
| <b>Molecular weight</b>                    | 799.68                                                           | 1158.03                                                            | 1173.82                                                                  |
| <b>Spatial group</b>                       | <i>I</i> 2/ <i>a</i>                                             | P -1                                                               | <i>C</i> 2/ <i>c</i>                                                     |
| <b>Crystalline system</b>                  | Monoclinic                                                       | Triclinic                                                          | Monoclinic                                                               |
| <b>Crystal size/mm</b>                     | 0.30 × 0.07 × 0.05                                               | 0.18 × 0.14 × 0.04                                                 | 0.8 × 0.2 × 0.09                                                         |
| <b>a/Å</b>                                 | 14.424(4)                                                        | 10.6496(5)                                                         | 21.5284(13)                                                              |
| <b>b/Å</b>                                 | 12.7407(17)                                                      | 15.3841(9)                                                         | 14.0991(9)                                                               |
| <b>c/Å</b>                                 | 16.748(2)                                                        | 18.3830(10)                                                        | 15.6869(8)                                                               |
| <b>α/°</b>                                 | 90                                                               | 97.235(2)                                                          | 90                                                                       |
| <b>β/°</b>                                 | 99.930(7)                                                        | 105.836(2)                                                         | 94.982(4)                                                                |
| <b>γ/°</b>                                 | 90                                                               | 108.760(3)                                                         | 90                                                                       |
| <b>Temperature/K</b>                       | 100                                                              | 373(2)                                                             | 100                                                                      |
| <b>Volume/Å<sup>3</sup></b>                | 3031.6(10)                                                       | 2667.0(2)                                                          | 4743.5(5)                                                                |
| <b>Z</b>                                   | 4                                                                | 2                                                                  | 4                                                                        |
| <b>Density/g cm<sup>-3</sup></b>           | 1.752                                                            | 1.442                                                              | 1.644                                                                    |
| <b>Intervale θ°</b>                        | 2.5 - 19.1                                                       | 2.4 - 21.6                                                         | 2.9 - 26.2                                                               |
| <b>Measured reflexions</b>                 | 23453                                                            | 40098                                                              | 24181                                                                    |
| <b>Unique reflexions [R<sub>int</sub>]</b> | 2896 [0.150]                                                     | 10094 [0.086]                                                      | 3478 [0.054]                                                             |
| <b>μ/mm<sup>-1</sup></b>                   | 1.91                                                             | 1.110                                                              | 1.262                                                                    |
| <b>F(000)</b>                              | 1640                                                             | 1192                                                               | 2384                                                                     |
| <b>Residues/e Å<sup>-3</sup></b>           | 0.56 and -0.94                                                   | 0.794 and -0.537                                                   | 1.18 and -0.63                                                           |
| <b>R Final Index [I&gt;2σ(I)]</b>          | 0.0612 [0.1383]                                                  | 0.0545 [0.1138]                                                    | 0.0342 [0.0779]                                                          |
| <b>R Index [all data]</b>                  | 0.1108 [0.1682]                                                  | 0.1038 [0.1298]                                                    | 0.0522 [0.0845]                                                          |

Table S2. Main bond distances and angles for  $[\text{Zn}_2(\text{L}^{\text{Me}})_2]\cdot 3\text{H}_2\text{O}$  **1\*** zinc helicate.

| <b>Bond distances (Å)</b> |           |                 |            |                 |            |
|---------------------------|-----------|-----------------|------------|-----------------|------------|
| N(3)-Zn(1)                | 2.114(5)  | S(3)-Zn(1)      | 2.3865(19) | C(9)-N(5)       | 1.263(8)   |
| N(5)-Zn(1)                | 2.124(5)  | C(3)-N(3)       | 1.290(8)   | C(10)-S(2)      | 1.747(7)   |
| N(4)-Zn(1)                | 2.485(5)  | C(2)-S(3)       | 1.739(6)   | S(2)-Zn(1)      | 2.3423(19) |
| <b>Bond angles (°)</b>    |           |                 |            |                 |            |
| N(3)-Zn(1)-S(3)           | 80.53(15) | N(3)-Zn(1)-N(4) | 70.94(18)  | C(9)-N(5)-N(6)  | 116.0(5)   |
| N(5)-Zn(1)-S(2)           | 82.37(15) | N(5)-Zn(1)-N(4) | 102.64(18) | C(10)-N(5)-N(6) | 112.8(5)   |
| S(3)-Zn(1)-S(2)           | 112.48(7) | C(3)-N(3)-N(2)  | 116.3(5)   | N(1)-C(2)-S(3)  | 115.7(5)   |
| C(2)-N(2)-N(3)            | 113.2(5)  |                 |            |                 |            |

Table S3. Main bond distances and angles for  $[\text{Zn}_2(\text{L}^{\text{Ph}})_2]\cdot 4\text{CH}_3\text{CN}$  **2\*** zinc helicate.

| Bond distances (Å) |           |                   |            |                   |          |
|--------------------|-----------|-------------------|------------|-------------------|----------|
| N(3)-Zn(1)         | 2.081(4)  | S(1)-Zn(1)        | 2.3593(12) | C(14)-N(5)        | 1.280(6) |
| N(4)-Zn(1)         | 2.463(3)  | S(2)-Zn(2)        | 2.3381(13) | C(15)-S(2)        | 1.741(5) |
| N(5)-Zn(2)         | 2.081(4)  | S(3)-Zn(1)        | 2.3384(13) | C(28)-S(3)        | 1.741(5) |
| N(10)-Zn(1)        | 2.084(4)  | S(4)-Zn(2)        | 2.3777(12) | C(29)-N(10)       | 1.284(5) |
| N(11)-Zn(2)        | 2.446(3)  | C(7)-S(1)         | 1.738(5)   | C(35)-N(12)       | 1.287(5) |
| N(12)-Zn(2)        | 2.080(4)  | C(8)-N(3)         | 1.278(5)   |                   |          |
| Bond angles (°)    |           |                   |            |                   |          |
| N(10)-Zn(1)-S(3)   | 83.30(11) | N(5)-Zn(2)-S(2)   | 83.58(11)  | N(13)-N(12)-Zn(2) | 123.2(3) |
| N(3)-Zn(1)-S(1)    | 81.96(10) | N(12)-Zn(2)-S(4)  | 81.23(10)  | C(36)-N(13)-N(12) | 112.7(4) |
| S(3)-Zn(1)-S(1)    | 111.71(5) | S(2)-Zn(2)-S(4)   | 110.53(5)  | C(35)-N(12)-N(13) | 116.1(4) |
| N(3)-Zn(1)-N(4)    | 72.07(13) | N(12)-Zn(2)-N(11) | 72.20(13)  | N(14)-C(36)-S(4)  | 114.4(3) |
| N(10)-Zn(1)-N(4)   | 94.92(13) | N(5)-Zn(2)-N(11)  | 97.47(13)  | C(14)-N(5)-N(6)   | 115.4(4) |
| C(8)-N(3)-N(2)     | 116.7(4)  | C(29)-N(10)-N(9)  | 116.0(4)   | C(15)-N(6)-N(7)   | 117.3(4) |
| C(7)-N(2)-N(3)     | 112.7(4)  | C(28)-N(9)-N(10)  | 113.3(4)   | N(7)-C(15)-S(2)   | 114.3(4) |
| N(1)-C(7)-S(1)     | 94.97(16) | N(8)-C(28)-S(3)   | 113.6(3)   |                   |          |

Table S4. Main bond distances and angles for  $[\text{Zn}_2(\text{L}^{\text{PhNO}_2})_2]$  **3\*** zinc helicate.

| Bond distances (Å) |            |                 |            |                 |          |
|--------------------|------------|-----------------|------------|-----------------|----------|
| N(4)-Zn(1)         | 2.062(2)   | S(3)-Zn(2)      | 2.3857(7)  | C(14)-N(6)      | 1.287(3) |
| S(4)-Zn(1)         | 2.3203(7)  | C(7)-S(4)       | 1.737(3)   | C(15)-S(3)      | 1.737(3) |
| N(6)-Zn(2)         | 2.116(2)   | C(8)-N(4)       | 1.279(3)   |                 |          |
| Bond angles (°)    |            |                 |            |                 |          |
| N(4)-Zn(1)-S(4)    | 84.14(6)   | N(6)-Zn(2)-S(3) | 110.45(6)  | C(8)-N(4)-N(3)  | 115.1(2) |
| S(4)-Zn(1)-S(4)    | 122.23(4)  | S(3)-Zn(2)-S(3) | 118.20(4)  | C(14)-N(6)-N(7) | 114.5(2) |
| N(4)-Zn(1)-N(4)    | 145.32(12) | N(6)-Zn(2)-N(6) | 158.14(12) | N(3)-C(7)-S(4)  | 127.9(2) |
| N(7)-C(15)-S(3)    | 127.7(2)   | N(2)-C(7)-N(3)  | 117.3(2)   | N(7)-C(15)-N(8) | 116.6(2) |

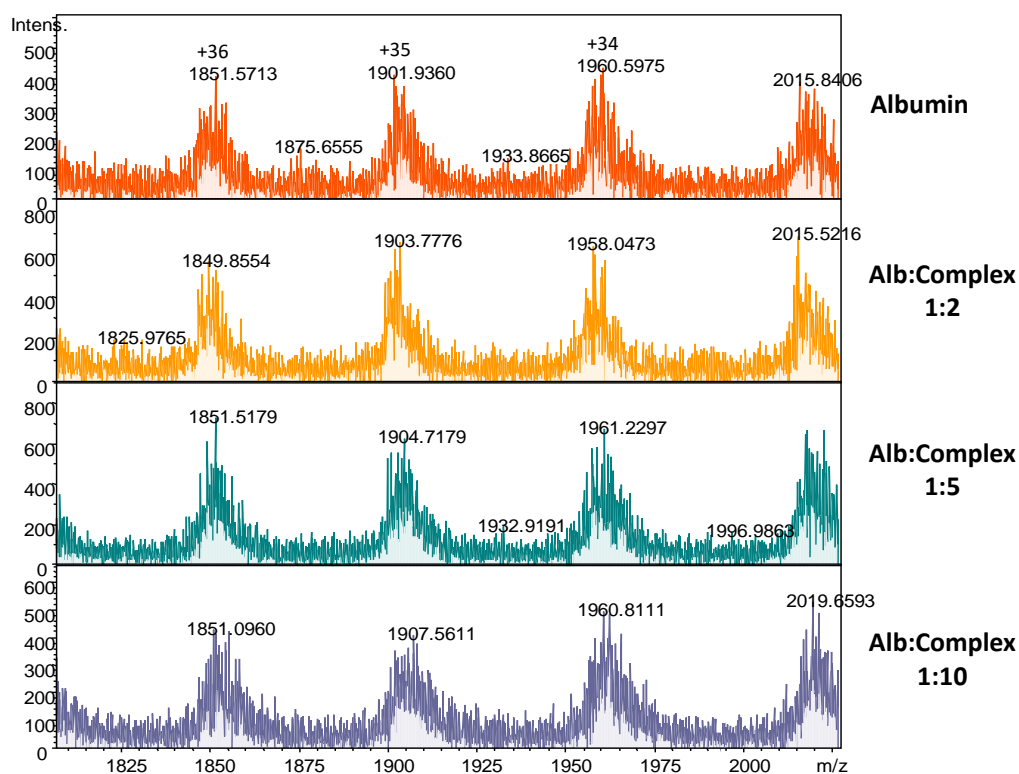

Figure S10. ESI MS-TOF titration of human serum albumin (MW= 66550 Da) with  $\text{Zn}_2(\text{L}^{\text{Ph}})_2 \cdot 2\text{H}_2\text{O}$  2 helicate.

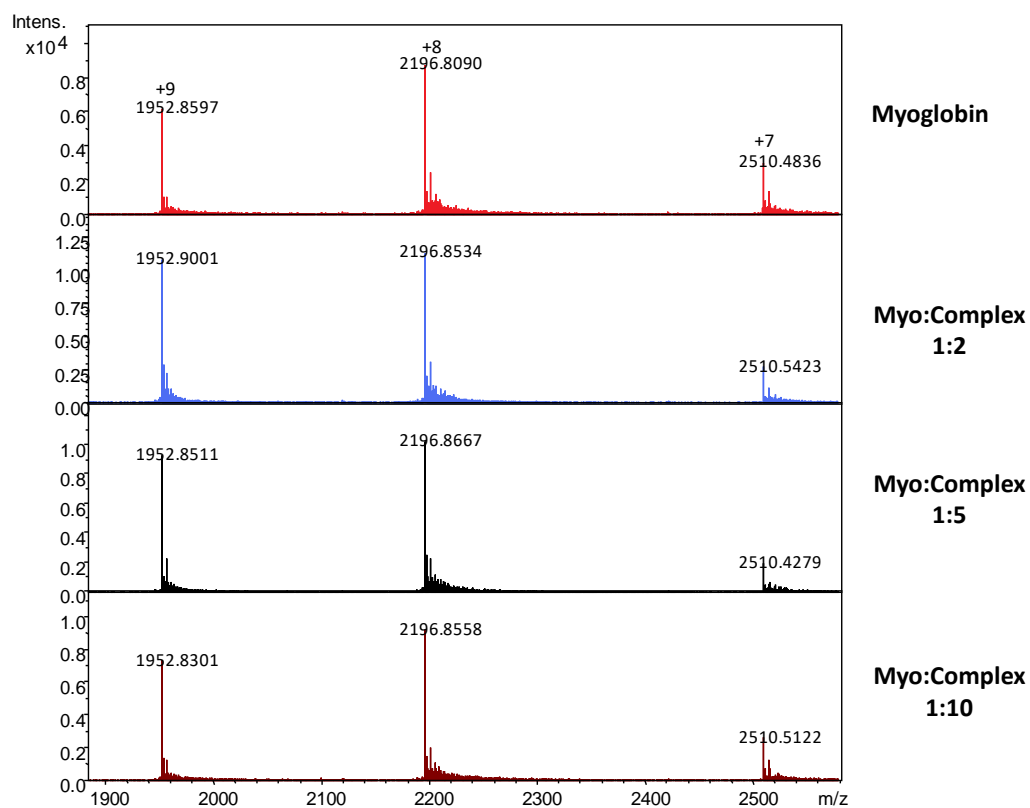

Figure S11. ESI MS-TOF titration of myoglobin (MW= 17567 Da) with  $\text{Zn}_2(\text{L}^{\text{Ph}})_2 \cdot 2\text{H}_2\text{O}$  2 helicate.

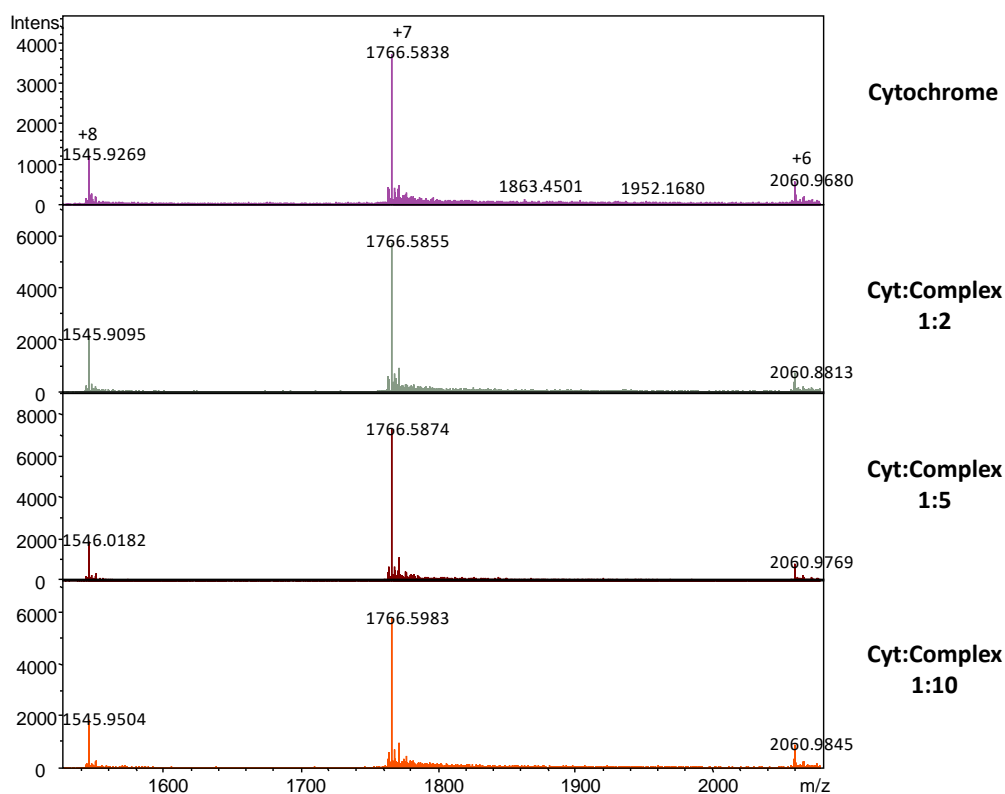

Figure S12. ESI MS-TOF titration of cytochrome C (MW= 12359 Da) with  $\text{Zn}_2(\text{L}^{\text{Ph}})_2 \cdot 2\text{H}_2\text{O}$  2 helicate.

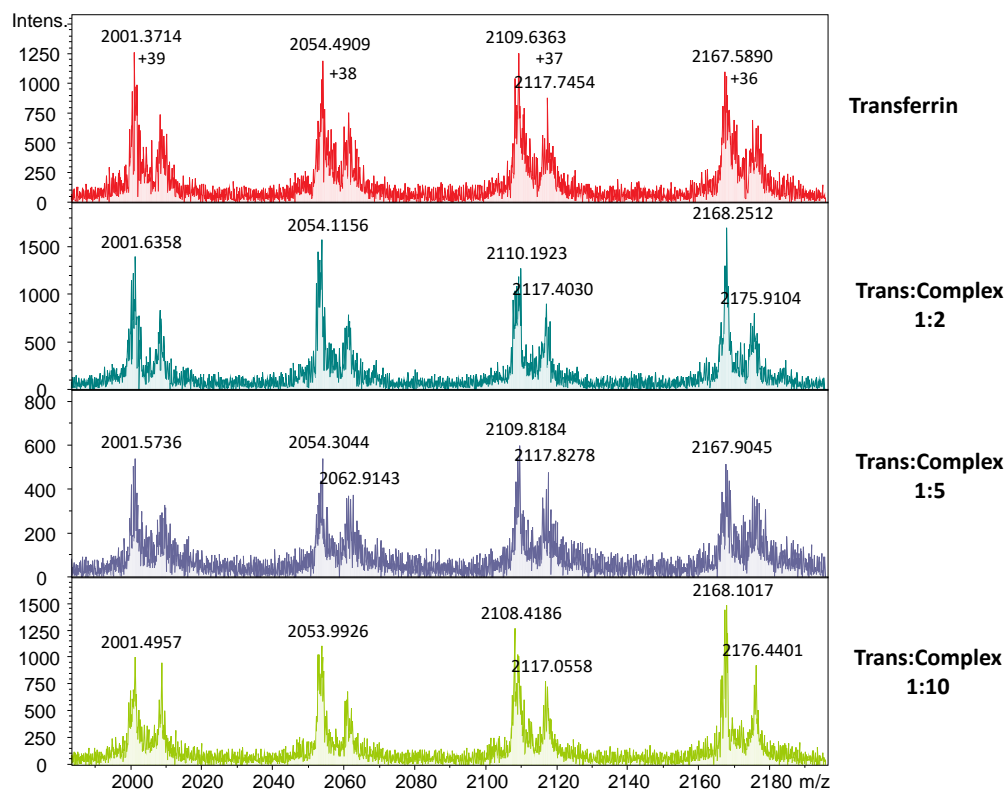

Figure S13. ESI MS-TOF titration of transferrin (MW= 78019 Da) with  $\text{Zn}_2(\text{L}^{\text{Ph}})_2 \cdot 2\text{H}_2\text{O}$  2 helicate.



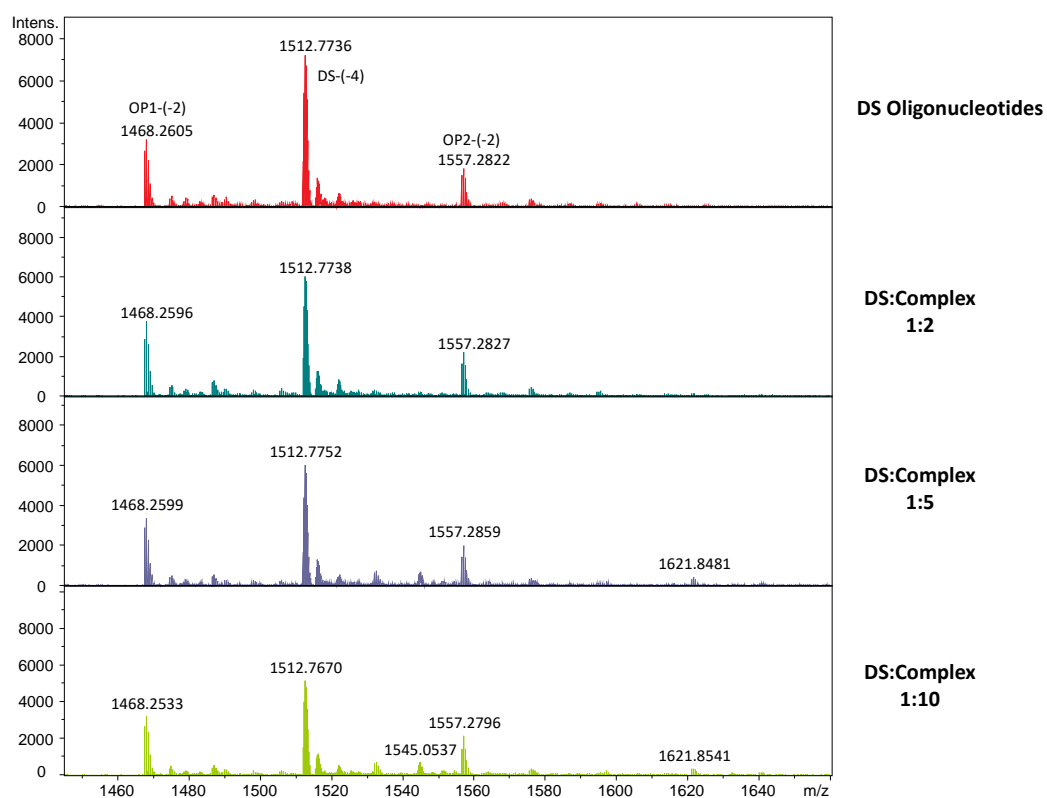

Figure S14. ESI MS-TOF titration of double-stranded oligonucleotides (DS) with  $\text{Zn}_2(\text{L}^{\text{Ph}})_2 \cdot 2\text{H}_2\text{O}$  2 helicate.

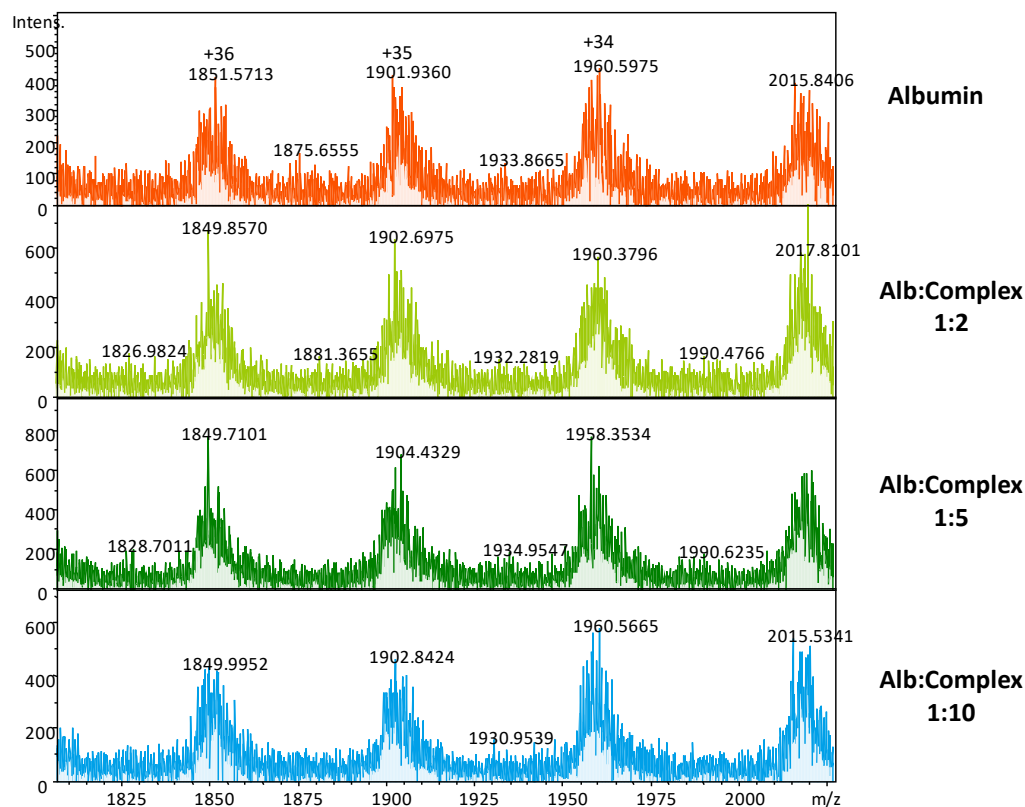

Figure S15. ESI MS-TOF titration of human serum albumin (MW= 66550 Da) with  $\text{Zn}_2(\text{L}^{\text{PhNO}_2})_2$  3 helicate.

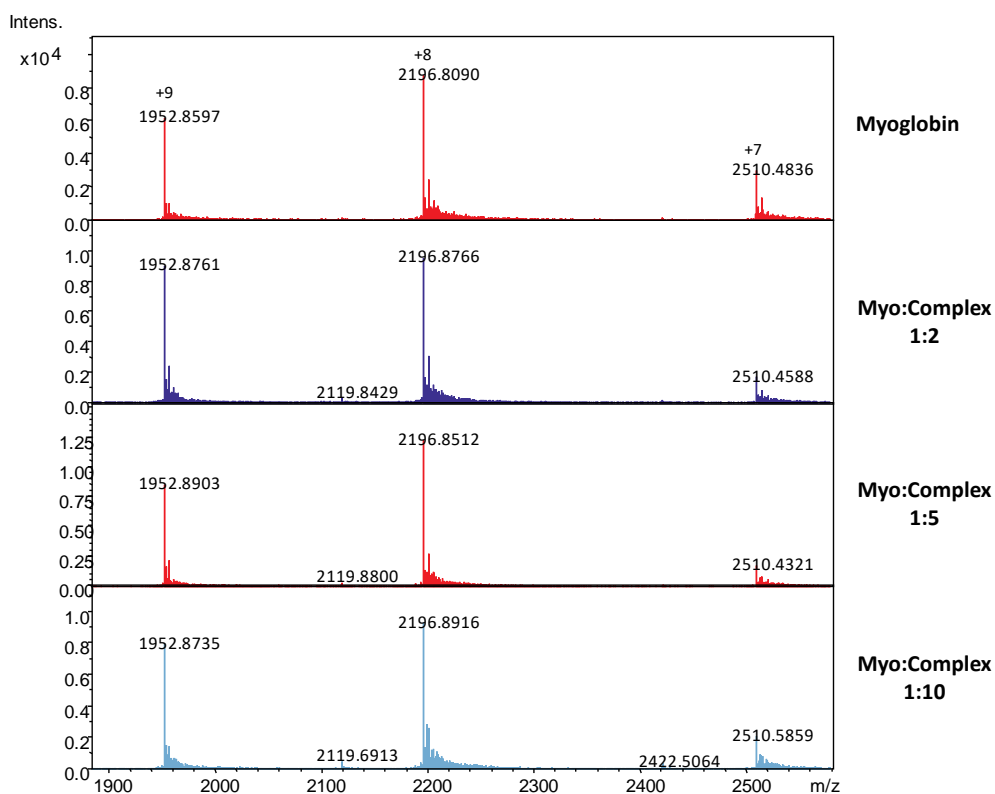

Figure S16. ESI MS-TOF titration of myoglobin (MW= 17567 Da) with  $\text{Zn}_2(\text{L}^{\text{PhNO}_2})_2 \mathbf{3}$  helicate.

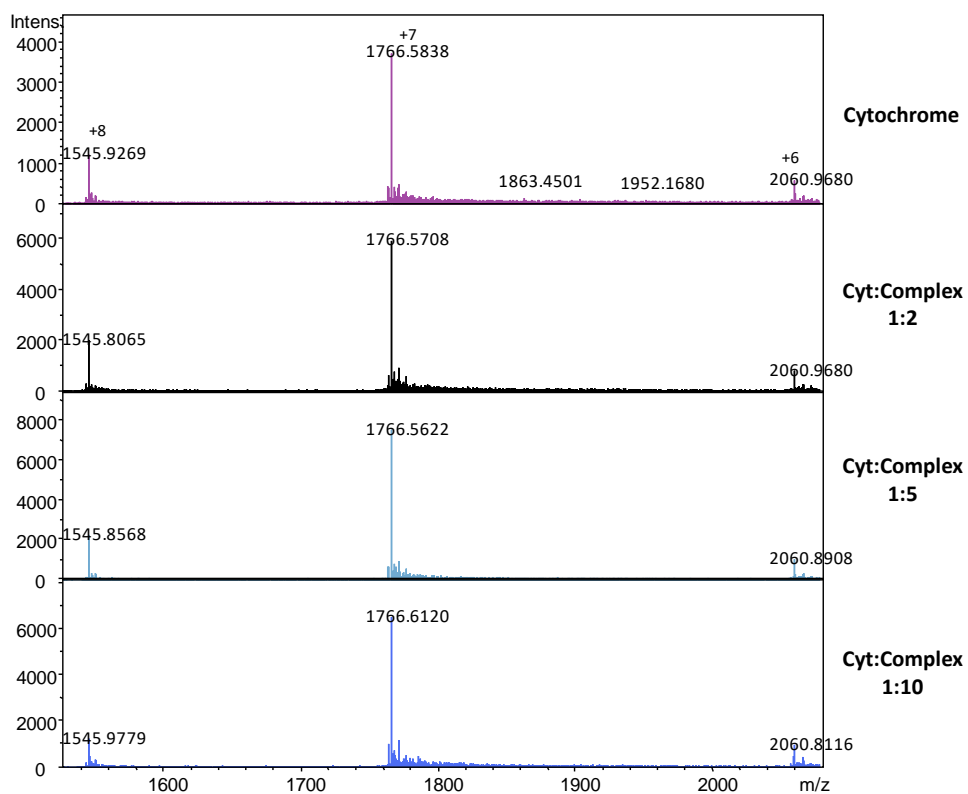

Figure S17. ESI MS-TOF titration of cytochrome C (MW= 12359 Da) with  $\text{Zn}_2(\text{L}^{\text{PhNO}_2})_2 \mathbf{3}$  helicate.

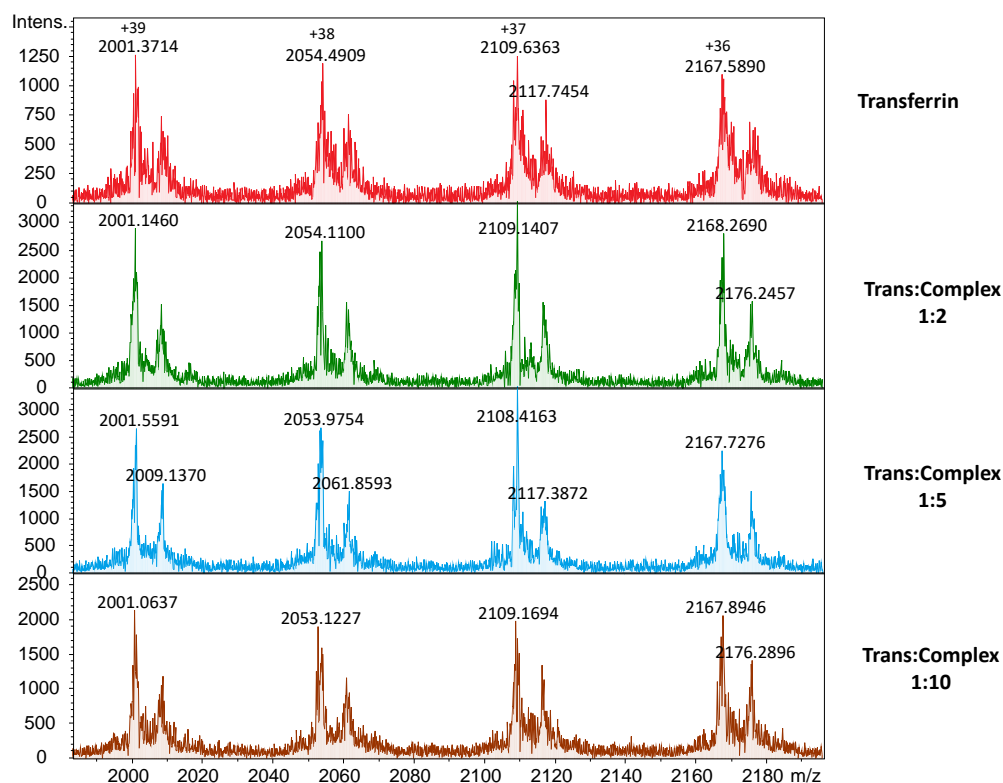

Figure S18. ESI MS-TOF titration of transferrin (MW= 78019 Da) with  $\text{Zn}_2(\text{L}^{\text{PhNO}_2})_2 \mathbf{3}$  helicate.

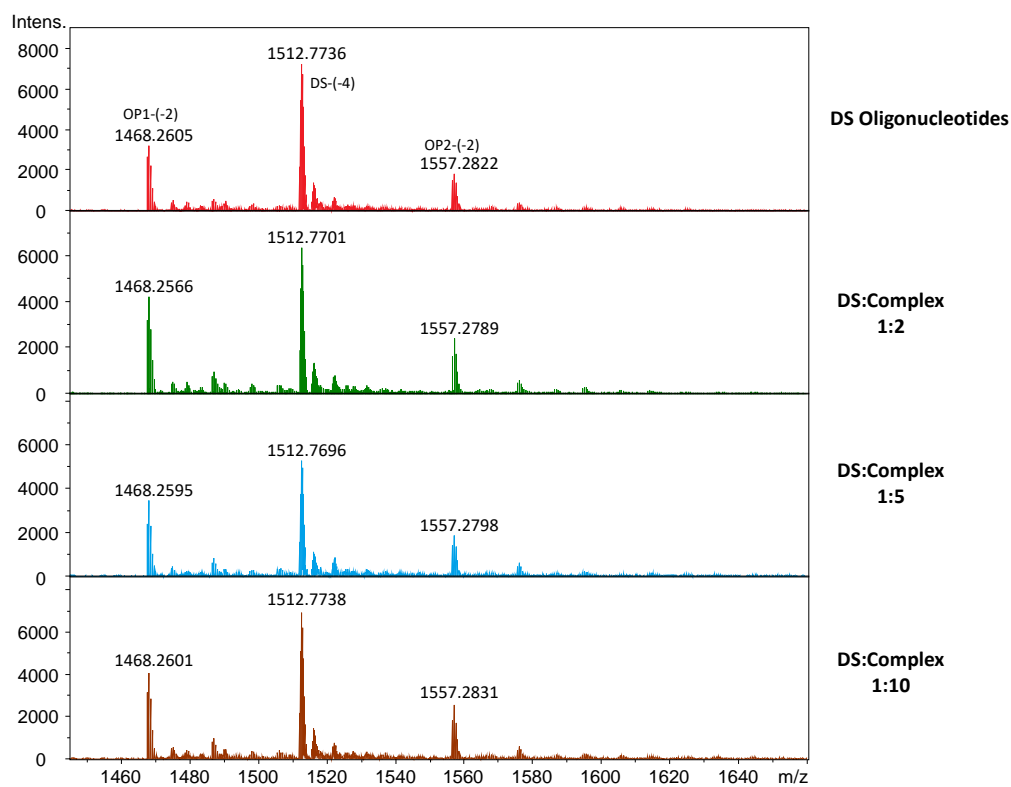

Figure S19. ESI MS-TOF titration of double-stranded oligonucleotides (DS) with  $\text{Zn}_2(\text{L}^{\text{PhNO}_2})_2 \mathbf{3}$  helicate.
